# Supplementary material for: Bupleuri Radix Prevents the Recurrences of Resected Colonic Polyps by Affecting Angiogenin-2-Induced Protein Kinase B/Akt Signaling
Source: J Oncol. 2020 Oct 28;2020:3531652. doi: 10.1155/2020/3531652 (PMC7657685; doi:10.1155/2020/3531652)
Supplement: Supplementary Materials — Figure S1: colorectal polyps were diagnosed with gastrointestinal endoscopy. Figure S2: neutrophil-to-lymphocyte ratio (NLR) between two groups. n = 38 and 17 for neoplastic and nonneoplastic samples in the AG group, and n = 40 and 17 for neoplastic and nonneoplastic samples in the BG group. The statistical difference was significant if p < 0.05 vs. the neoplastic group. Figure S3: classification of colonic polyps. Table S1: the concentrations of Ang and PKB/Akt, and the serum levels of compounds from BR in the BG group. [file 3531652.f1.doc]

***Bupleuri Radix* prevents the recurrences of resected colonic polyps by affecting angiogenin-2-induced protein kinase B/Akt signaling**

Qiang Gao1,#, Guihong Yu2,#, Minghui Yu3, Xinping Wang4,*

1Department of Spleen-stomach disease, Yantai Hospital of Traditional Chinese Medicine, Yantai 264002, China

2Department of Integrated TCM & Western Medicine, Yantai Qishan Hospital, Yantai 264000, China

3Department of Clinical Laboratory, Yantai Wanhua Hospital, Yantai 260000, China

4Department of Clinical Laboratory, Yantai Hospital of Traditional Chinese Medicine, Yantai, 264002, China

Figure S1


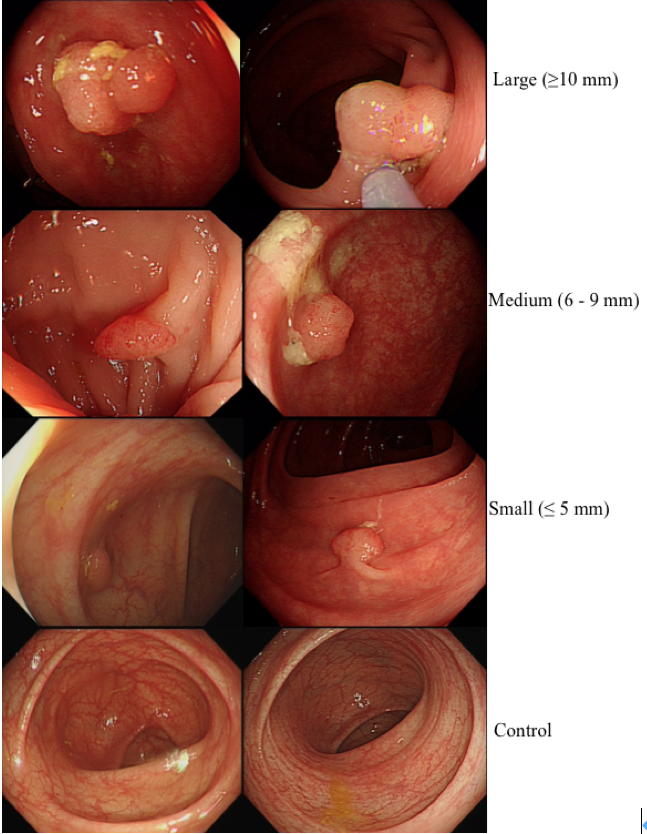


Figure S1. Colorectal polyps were diagnosed with gastrointestinal endoscopy.

Figure S2


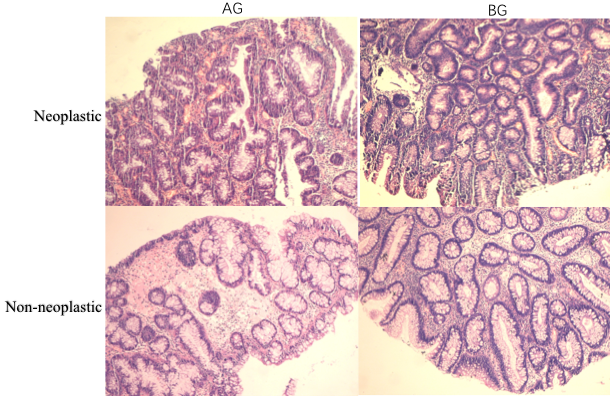


Figure S2: Neutrophil-to-lymphocyte ratio (NLR) between two groups. n=38 and 17 for neoplastic and non-neoplastic samples in the AG group and n=40 and 17 for neoplastic and non-neoplastic samples in the BG group. The statistical difference was significant if p < 0.05 vs the neoplastic group.

Figure S3

Figure S3. Classification of colonic polyps.

Table S1. The concentrations of Ang and PKB/Akt, and the serum levels of compounds from BR in the BG group.

| Ang (pg/mL) | PKB/Akt (pg/mL) | Paeniflori (pg/mL) | Baiclin  (pg/mL) | Saikosaponin a (pg/mL) | Bupleurum saponin b2 (pg/mL) |
| --- | --- | --- | --- | --- | --- |
| 156.6 | 214.1 | 17.6 | 88.1 | 33.2 | 20.5 |
| 148.2 | 213.2 | 17.7 | 89.5 | 31.9 | 26.6 |
| 143.9 | 210.1 | 16.4 | 86.3 | 33.5 | 24.6 |
| 143.3 | 209.1 | 16.7 | 81.9 | 30.7 | 27.2 |
| 141.7 | 208.4 | 15.5 | 88.1 | 37.3 | 24.9 |
| 141.6 | 204.1 | 19.1 | 84.3 | 39.6 | 19.4 |
| 140.6 | 179.3 | 19.0 | 86.3 | 31.4 | 22.3 |
| 134.3 | 177.9 | 15.6 | 88.2 | 33.1 | 24.4 |
| 132.0 | 175.5 | 19.2 | 84.2 | 38.1 | 25.5 |
| 127.9 | 173.8 | 15.3 | 83.5 | 33.5 | 20.8 |
| 127.6 | 169.1 | 15.4 | 89.0 | 31.7 | 24.7 |
| 125.8 | 164.5 | 18.2 | 80.7 | 33.5 | 24.7 |
| 123.5 | 162.2 | 19.5 | 89.2 | 36.8 | 24.4 |
| 120.1 | 159.2 | 15.3 | 89.5 | 37.8 | 25.4 |
| 119.5 | 155.5 | 15.6 | 80.3 | 33.4 | 25.4 |
| 119.5 | 148.5 | 19.6 | 85.0 | 35.0 | 27.1 |
| 118.2 | 143.8 | 19.9 | 85.7 | 32.1 | 20.0 |
| 115.1 | 140.6 | 18.2 | 81.7 | 39.9 | 27.5 |
| 113.6 | 139.9 | 17.7 | 82.3 | 39.4 | 27.6 |
| 110.7 | 139.2 | 19.3 | 89.4 | 37.0 | 23.0 |
| 110.0 | 131.6 | 16.8 | 89.7 | 39.1 | 21.9 |
| 107.8 | 129.0 | 15.8 | 86.5 | 39.5 | 20.2 |
| 106.7 | 121.9 | 15.2 | 88.2 | 35.9 | 21.2 |
| 102.9 | 120.7 | 18.3 | 86.5 | 34.9 | 23.7 |
| 102.5 | 119.6 | 15.6 | 88.0 | 30.8 | 19.8 |
| 100.2 | 118.8 | 16.7 | 83.8 | 34.7 | 21.0 |
| 99.9 | 118.1 | 16.6 | 83.0 | 33.8 | 20.4 |
| 97.0 | 114.7 | 18.6 | 88.9 | 32.9 | 18.6 |
| 96.2 | 113.7 | 16.0 | 80.3 | 31.3 | 26.7 |
| 96.0 | 112.8 | 19.5 | 95.3 | 42.7 | 25.1 |
| 95.0 | 110.8 | 22.0 | 97.5 | 41.4 | 31.6 |
| 90.8 | 108.2 | 23.0 | 95.0 | 41.0 | 27.9 |
| 88.9 | 107.6 | 20.1 | 95.0 | 46.4 | 37.4 |
| 87.7 | 105.1 | 21.6 | 86.8 | 47.2 | 37.3 |
| 86.6 | 98.3 | 23.8 | 85.7 | 49.7 | 27.5 |
| 84.7 | 97.6 | 23.0 | 91.9 | 45.5 | 29.6 |
| 82.0 | 96.6 | 20.6 | 97.7 | 44.5 | 33.0 |
| 80.4 | 93.3 | 22.8 | 87.2 | 45.7 | 24.9 |
| 79.8 | 91.2 | 23.6 | 86.8 | 35.6 | 29.6 |
| 78.0 | 91.1 | 20.7 | 94.5 | 38.3 | 34.0 |
| 77.9 | 90.6 | 20.6 | 96.1 | 42.3 | 24.3 |
| 77.2 | 89.1 | 18.5 | 95.0 | 49.9 | 28.2 |
| 76.0 | 88.7 | 21.5 | 97.7 | 49.0 | 27.6 |
| 73.6 | 84.3 | 21.4 | 85.0 | 39.0 | 23.4 |
| 73.5 | 83.8 | 18.4 | 91.3 | 45.3 | 26.7 |
| 72.2 | 82.3 | 22.8 | 86.0 | 50.0 | 34.0 |
| 69.6 | 81.9 | 17.8 | 95.3 | 40.8 | 35.2 |
| 69.5 | 80.7 | 22.3 | 95.3 | 37.8 | 25.4 |
| 68.4 | 79.0 | 20.4 | 93.0 | 40.6 | 26.7 |
| 67.8 | 77.8 | 18.3 | 91.0 | 39.3 | 36.1 |
| 67.3 | 76.2 | 20.2 | 92.5 | 40.9 | 26.0 |
| 67.0 | 74.2 | 20.4 | 95.9 | 45.6 | 30.8 |
| 66.3 | 72.8 | 18.8 | 93.1 | 40.9 | 26.9 |
| 65.9 | 71.0 | 22.9 | 91.5 | 36.8 | 30.0 |
| 63.1 | 71.0 | 17.5 | 87.8 | 43.8 | 30.9 |
| 61.8 | 69.6 | 21.2 | 99.8 | 47.3 | 36.9 |
| 61.0 | 69.5 | 18.0 | 90.8 | 48.1 | 29.1 |
| 60.3 | 69.4 | 22.6 | 98.3 | 38.7 | 34.3 |
| 60.3 | 68.7 | 19.8 | 91.3 | 36.9 | 31.8 |
| 57.1 | 67.5 | 29.1 | 96.3 | 56.6 | 40.6 |
| 56.9 | 66.7 | 29.1 | 100.3 | 48.6 | 40.2 |
| 55.9 | 66.4 | 24.8 | 99.0 | 56.1 | 39.8 |
| 55.2 | 66.3 | 30.5 | 107.2 | 41.7 | 33.6 |
| 54.8 | 66.3 | 28.4 | 101.8 | 42.9 | 36.6 |
| 50.9 | 65.9 | 27.4 | 101.1 | 58.6 | 46.7 |
| 49.6 | 65.8 | 24.1 | 93.1 | 54.0 | 38.0 |
| 49.1 | 65.8 | 30.4 | 93.0 | 59.3 | 38.8 |
| 48.2 | 64.9 | 32.3 | 91.1 | 44.2 | 45.3 |
| 47.9 | 63.6 | 26.2 | 101.2 | 55.4 | 37.2 |
| 47.2 | 63.2 | 23.7 | 101.0 | 59.8 | 47.6 |
| 47.0 | 61.9 | 22.8 | 97.2 | 53.0 | 35.8 |
| 46.5 | 60.9 | 33.7 | 107.8 | 58.7 | 32.0 |
| 43.9 | 60.2 | 24.1 | 91.0 | 53.0 | 42.2 |
| 43.3 | 59.1 | 31.7 | 92.2 | 57.7 | 41.0 |
| 43.1 | 59.0 | 30.5 | 97.0 | 40.8 | 47.0 |
| 42.5 | 57.2 | 31.8 | 102.8 | 48.2 | 35.5 |
| 41.6 | 56.7 | 23.9 | 93.4 | 51.6 | 45.2 |
| 41.4 | 54.9 | 33.6 | 93.0 | 41.6 | 32.5 |
| 40.9 | 54.4 | 29.0 | 99.5 | 53.6 | 36.4 |
| 40.7 | 52.4 | 26.0 | 94.6 | 46.8 | 46.7 |
| 39.8 | 52.4 | 31.6 | 91.2 | 51.2 | 32.7 |
| 39.4 | 51.6 | 30.3 | 109.7 | 42.1 | 43.9 |
| 39.2 | 51.2 | 28.1 | 109.5 | 46.9 | 47.2 |
| 38.7 | 50.4 | 23.7 | 98.8 | 58.7 | 38.4 |
| 37.7 | 49.5 | 33.0 | 104.0 | 56.1 | 35.1 |
| 34.9 | 49.5 | 30.5 | 106.8 | 46.7 | 40.1 |
| 34.1 | 48.5 | 23.2 | 109.1 | 53.6 | 43.8 |
| 32.8 | 48.1 | 27.0 | 94.1 | 41.2 | 40.9 |
| 32.4 | 47.9 | 22.5 | 106.1 | 56.2 | 29.4 |
| 32.3 | 47.4 | 25.0 | 103.6 | 62.2 | 50.2 |
| 31.3 | 46.5 | 27.3 | 100.2 | 69.9 | 37.5 |
| 30.6 | 46.5 | 30.2 | 102.7 | 58.2 | 40.8 |
| 29.6 | 45.9 | 37.9 | 97.9 | 51.8 | 55.2 |
| 27.6 | 44.5 | 25.5 | 110.7 | 55.5 | 35.7 |
| 26.5 | 43.6 | 31.3 | 101.4 | 68.0 | 33.4 |
| 25.9 | 40.4 | 29.1 | 117.1 | 58.6 | 36.4 |
| 24.4 | 38.2 | 26.6 | 115.1 | 64.9 | 42.0 |
| 23.5 | 37.7 | 35.2 | 111.4 | 58.5 | 46.2 |
| 22.6 | 36.0 | 33.7 | 106.6 | 47.9 | 41.8 |
| 21.7 | 35.9 | 35.4 | 119.2 | 65.1 | 56.6 |
| 19.5 | 35.3 | 28.8 | 99.6 | 54.8 | 38.2 |
| 16.7 | 34.6 | 34.8 | 110.6 | 66.7 | 57.5 |
| 15.8 | 33.4 | 29.6 | 118.1 | 69.6 | 48.2 |
| 15.1 | 31.4 | 27.8 | 112.1 | 47.4 | 52.1 |
| 14.2 | 31.2 | 27.4 | 119.4 | 70.0 | 48.6 |
| 12.3 | 30.5 | 37.4 | 110.1 | 53.3 | 48.5 |
| 11.8 | 30.1 | 32.0 | 99.0 | 51.1 | 39.9 |
| 10.4 | 28.2 | 39.9 | 99.2 | 48.3 | 39.4 |
| 10.4 | 24.9 | 35.8 | 109.1 | 62.6 | 46.3 |
